# Supplementary material
Source: publisher figshare collection journal article supplement (https://acs.figshare.com/ndownloader/files/19224497)
Supplement: Supplementary file 1 [file 19224497]

# Supporting Information

## Natural-origin Hypocrellin-HSA Assembly for Highly Efficient NIR Light-responsive Phototheranostics against Hypoxic Tumors

*Chuangli Zhang,<sup>a,b</sup> Jiasheng Wu,<sup>a\*</sup> Weimin Liu,<sup>a,b</sup> Xiuli Zheng,<sup>a,b</sup> and Pengfei Wang<sup>a,b\*</sup>*

<sup>a</sup> Key Laboratory of Photochemical Conversion and Optoelectronic Materials and CityU-CAS Joint Laboratory of Functional Materials and Devices, Technical Institute of Physics and Chemistry, Chinese Academy of Sciences, Beijing 100190, P.R. China

<sup>b</sup> School of Future Technology, University of Chinese Academy of Sciences, Beijing 100049, P.R. China

\*Corresponding authors: wujs@mail.ipc.ac.cn, wangpf@mail.ipc.ac.cn

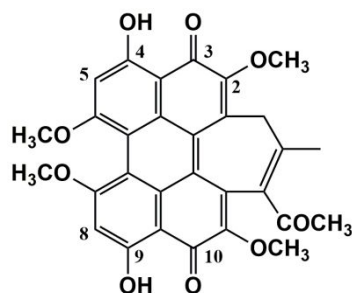

**Figure S1.** Schematic diagram of HB response sites.

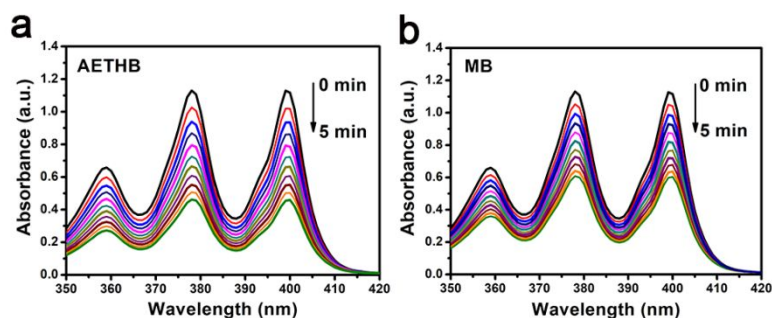

**Figure S2.** Photodegradation of ADPA with (a) **AETHB** and (b) MB under 671 nm laser irradiation ( $0.1 \text{ W cm}^{-2}$ ).

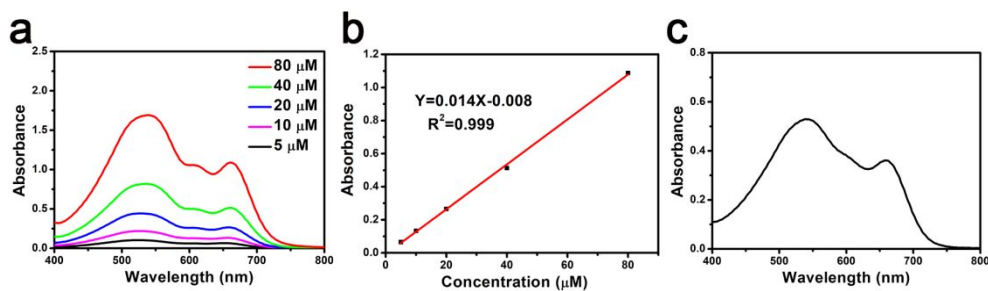

**Figure S3.** (a) UV-vis absorption spectra of **AETHB** in different concentrations. (b) Absorption calibration curve of **AETHB** at 660 nm. (c) The absorption value of **HSA-AETHB NPs** at 660 nm for the calculation of loading efficiency.

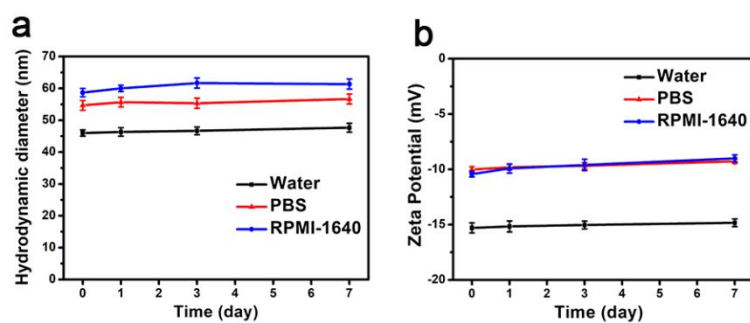

**Figure S4.** (a) The DLS stability of **HSA-AETHB NPs** for 0, 1, 3, and 7 days in water media (black line), PBS media (red line) and RPMI-1640 culture (blue line). (b) Zeta potential stability of **HSA-AETHB NPs** for 0, 1, 3, and 7 days in water media (black line), PBS media (red line) and RPMI-1640 culture (blue line).

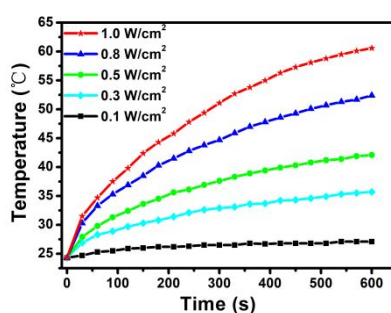

**Figure S5.** Temperature elevation of **HSA-AETHB NPs** (OD value: 0.2) under 671 nm laser irradiation with different laser power dose (0.1, 0.3, 0.5, 0.8 and 1.0 W cm<sup>-2</sup>, respectively).

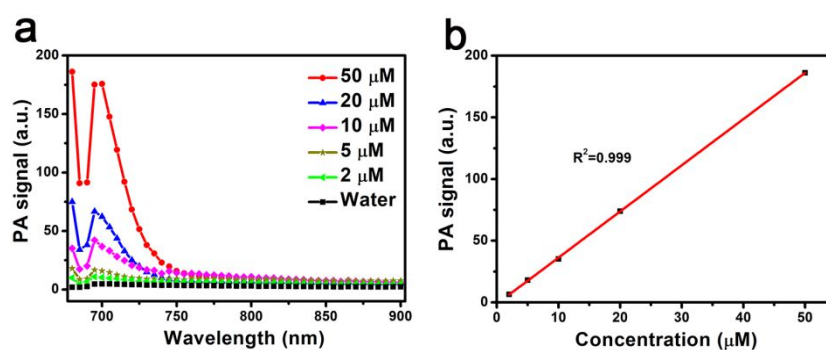

**Figure S6.** (a) PA signals of **HSA-AETHB NPs** with different concentrations (0, 2, 5, 10, 20, and 50 μM, respectively). (b) The linear relationship between the intensity of PA signal and the concentration of **HSA-AETHB NPs**.

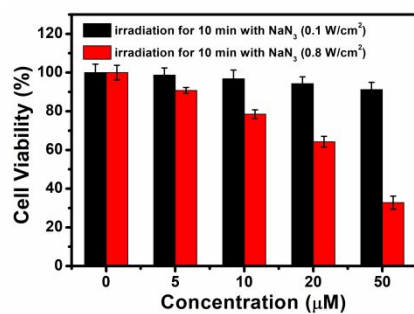

**Figure S7.** Relative viability of 4T1 cells incubated with different concentrations of **HSA-AETHB NPs** for 4 h and then irradiated 671 nm laser in the presence of 10 mM  $\text{NaN}_3$  (0.1  $\text{W cm}^{-2}$  or 0.8  $\text{W cm}^{-2}$ , 10 min).

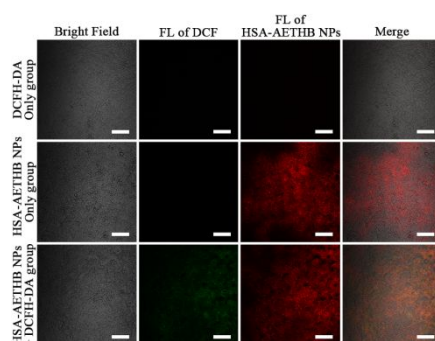

**Figure S8.** Intratumor ROS production after i.v. injection of **HSA-AETHB NPs** by fluorescence images of 4T1 tumor sections at 4 h. ROS intensity (green) was detected by intratumor injection of DCFH-DA. Scale bar is 200  $\mu\text{m}$ .

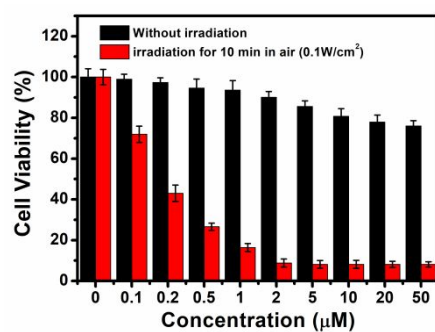

**Figure S9.** Relative viability of 4T1 cells incubated with different concentrations of **AETHB** for 4 h and then irradiated with and without 671 nm laser in air (0.1  $\text{W cm}^{-2}$ , 10 min).

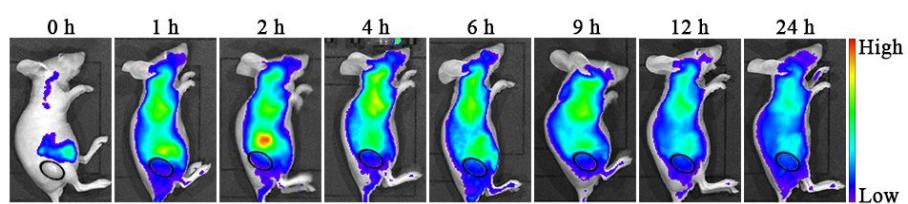

**Figure S10.** Real-time FL imaging of tumor sites after i.v. injection of **AETHB** in nude mice at different time points (0, 1, 2, 4, 6, 9, 12 and 24 h).

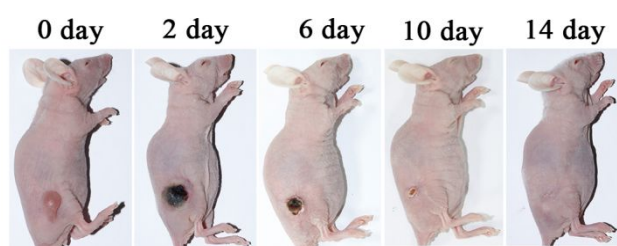

**Figure S11.** Photographs of the mice of PDT/PTT group on different days after treatment.
